# Supplementary material for: MRE11 Is Crucial for Malaria Parasite Transmission and Its Absence Affects Expression of Interconnected Networks of Key Genes Essential for Life
Source: MDPI journal article supplement (doi:10.3390/cells9122590), 2020-12-03

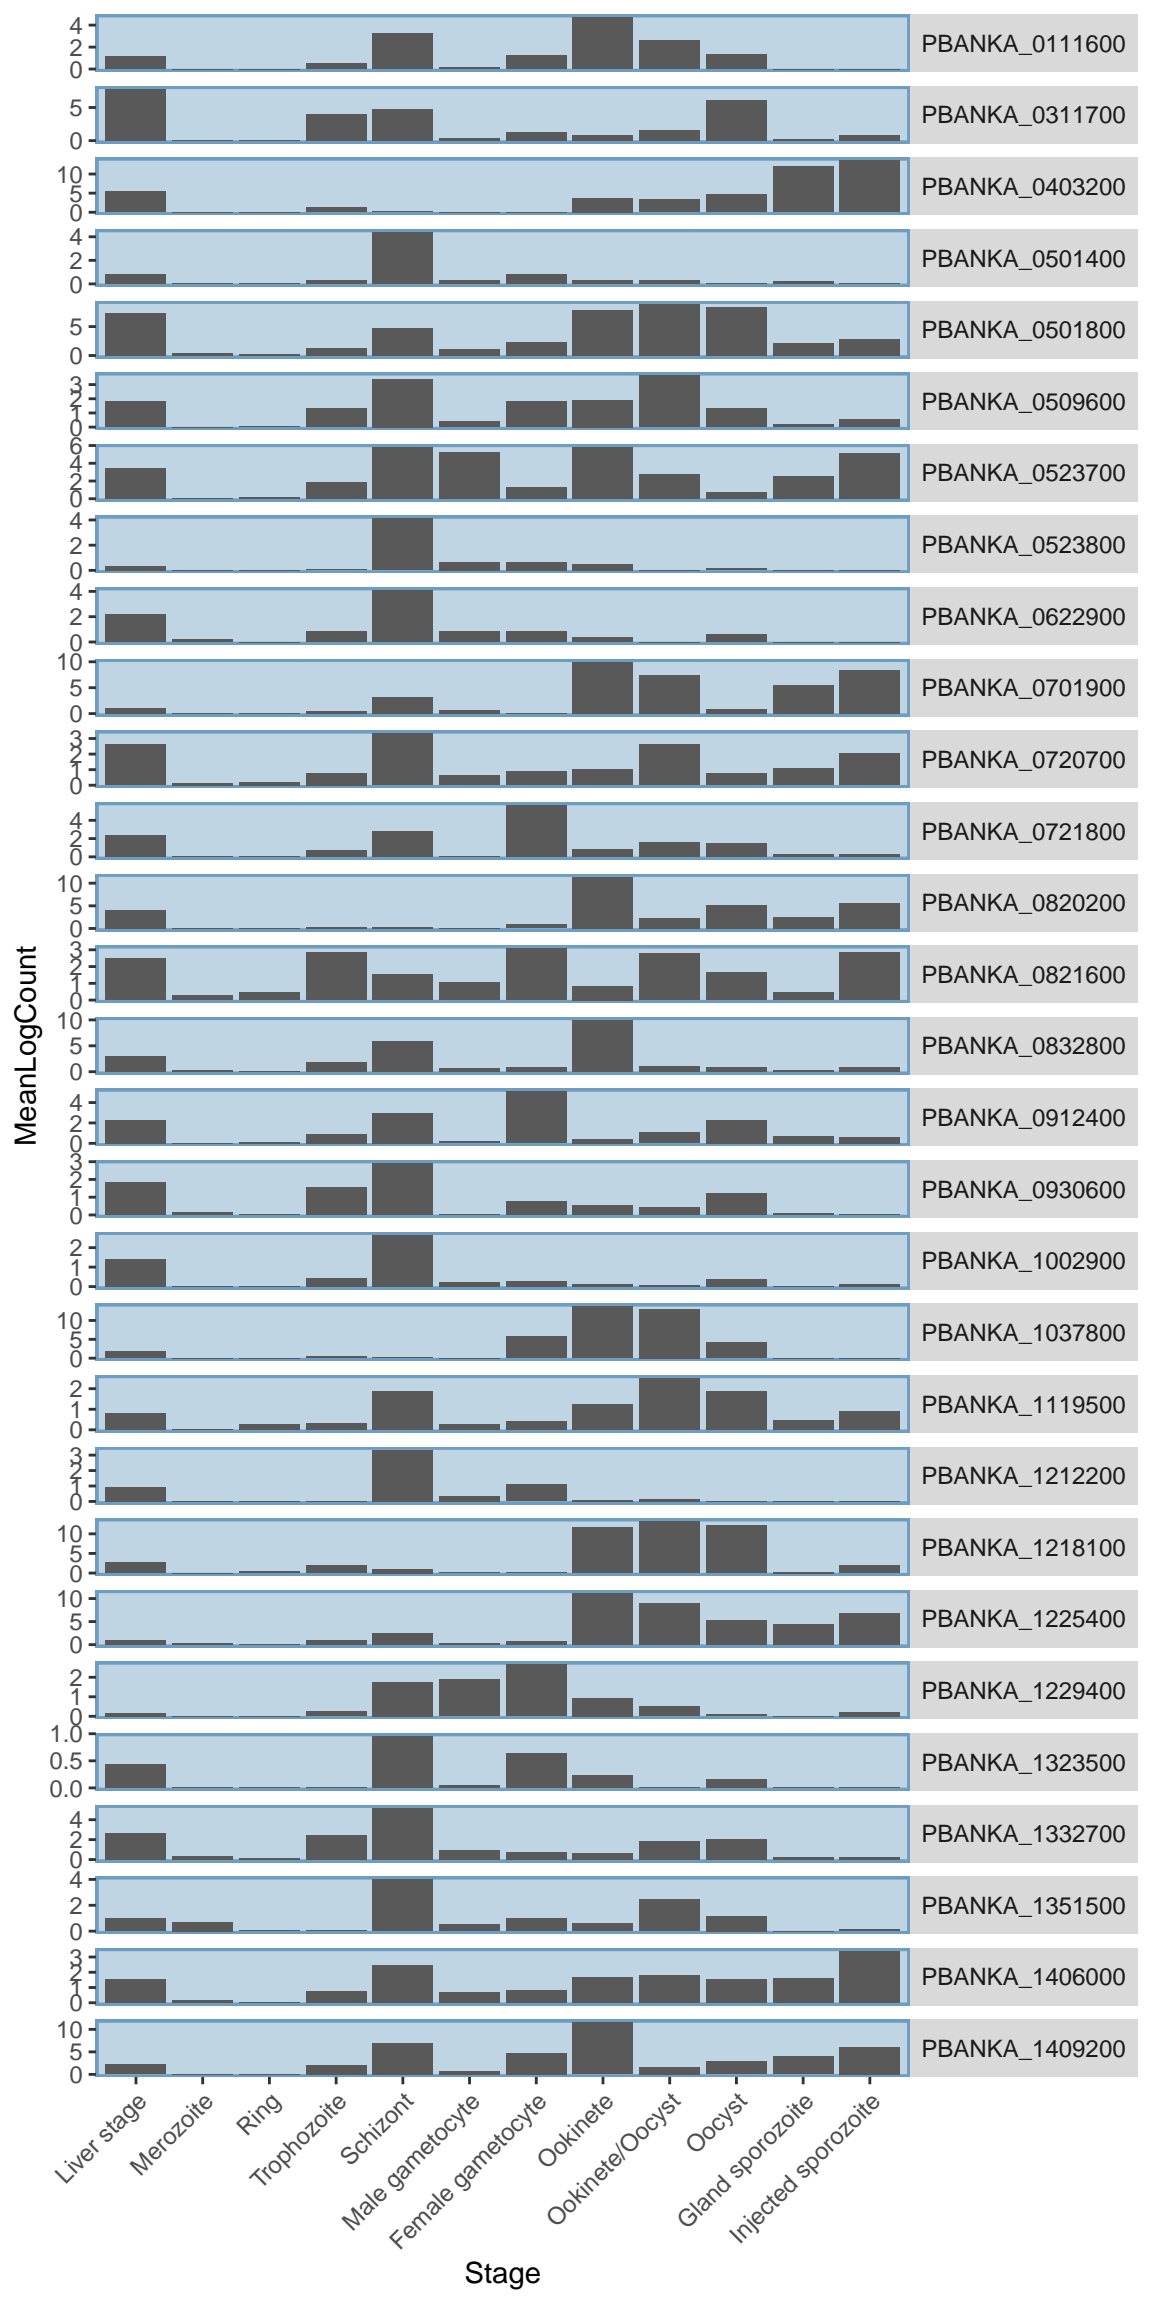

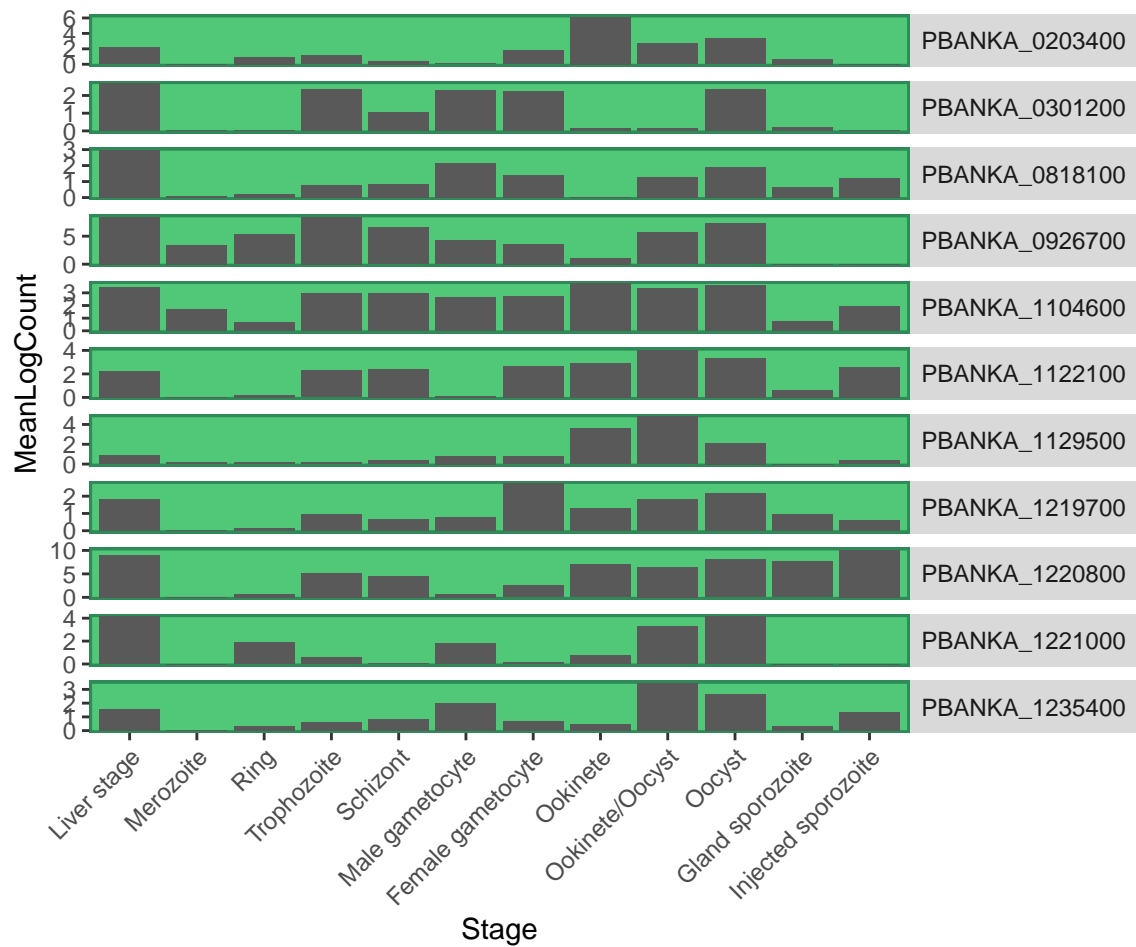

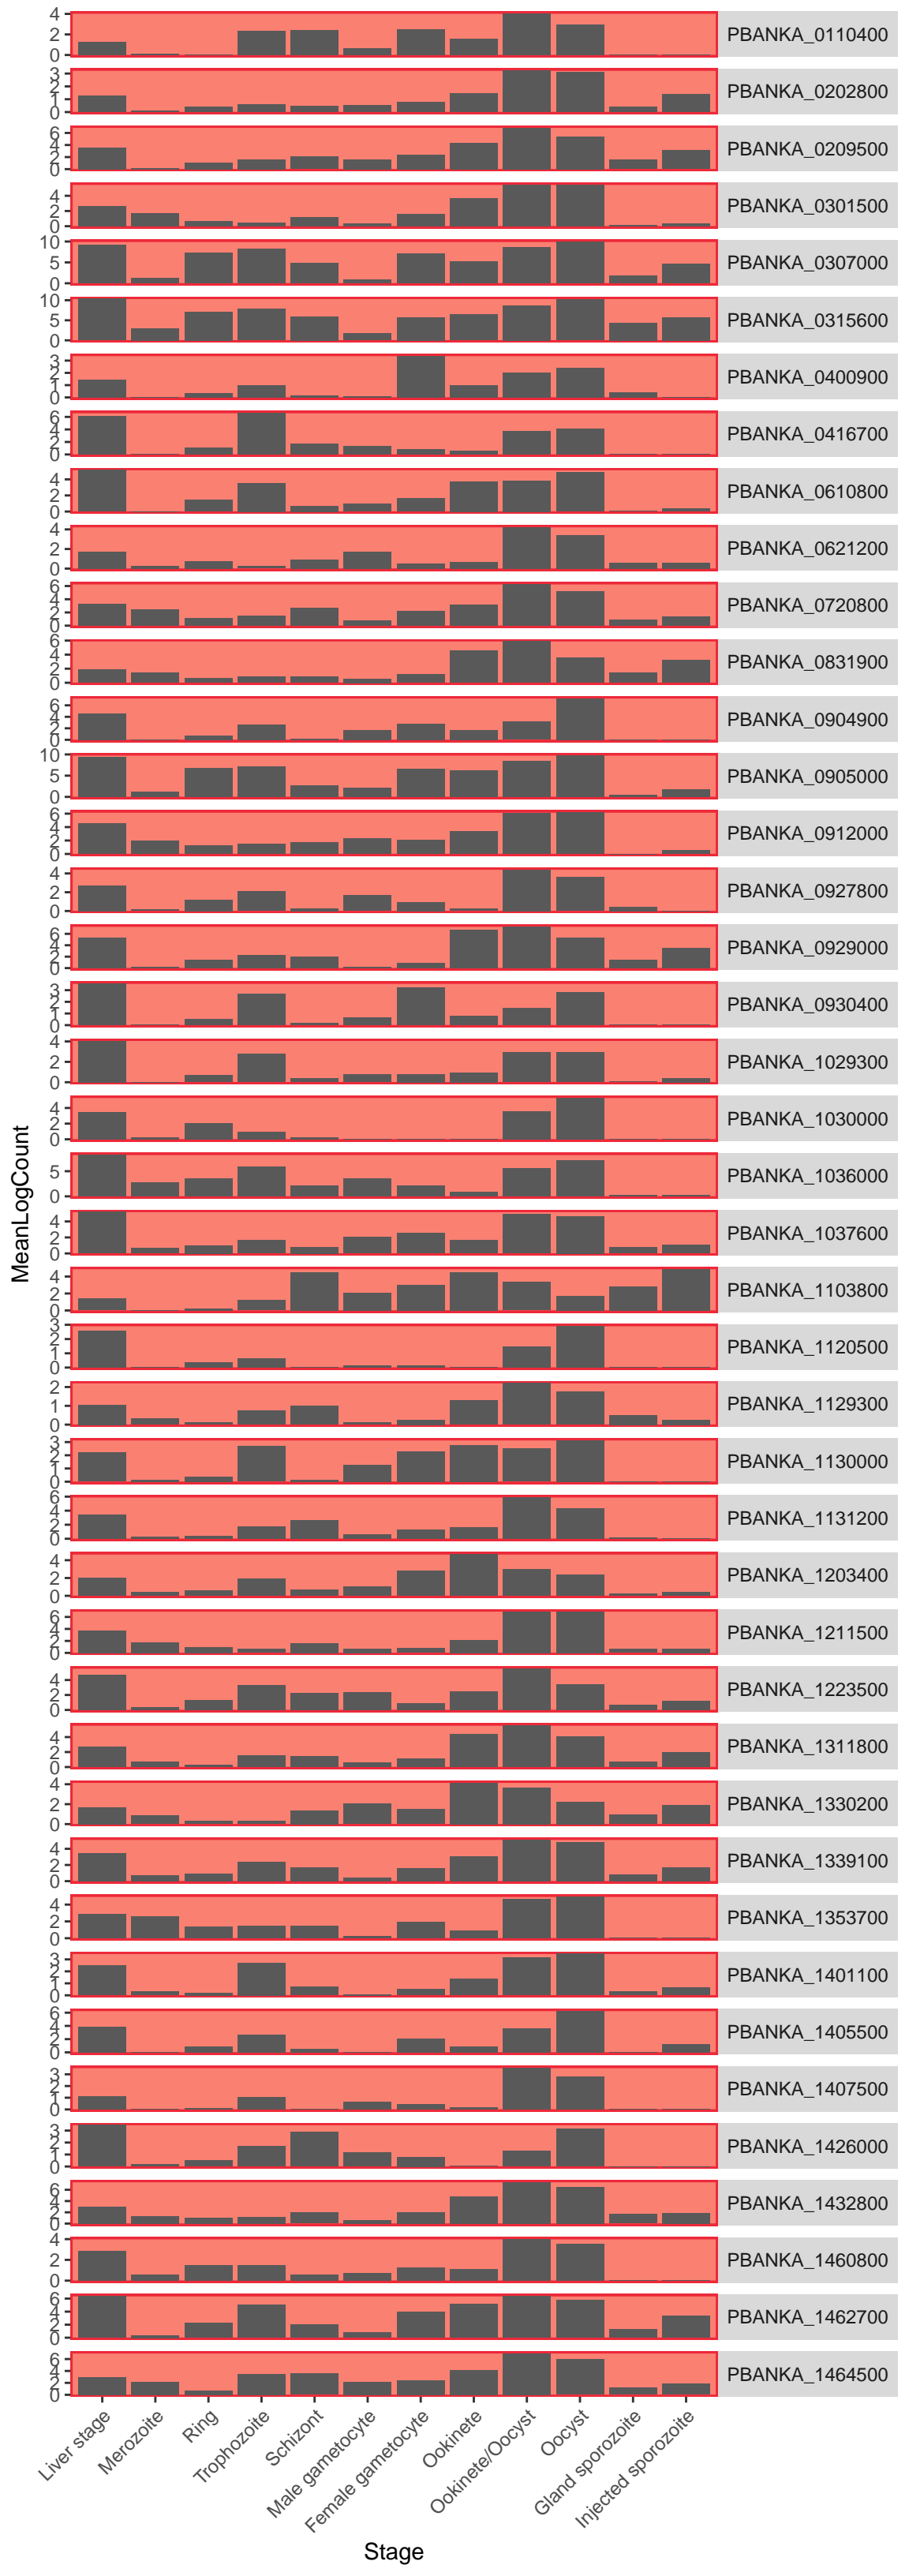

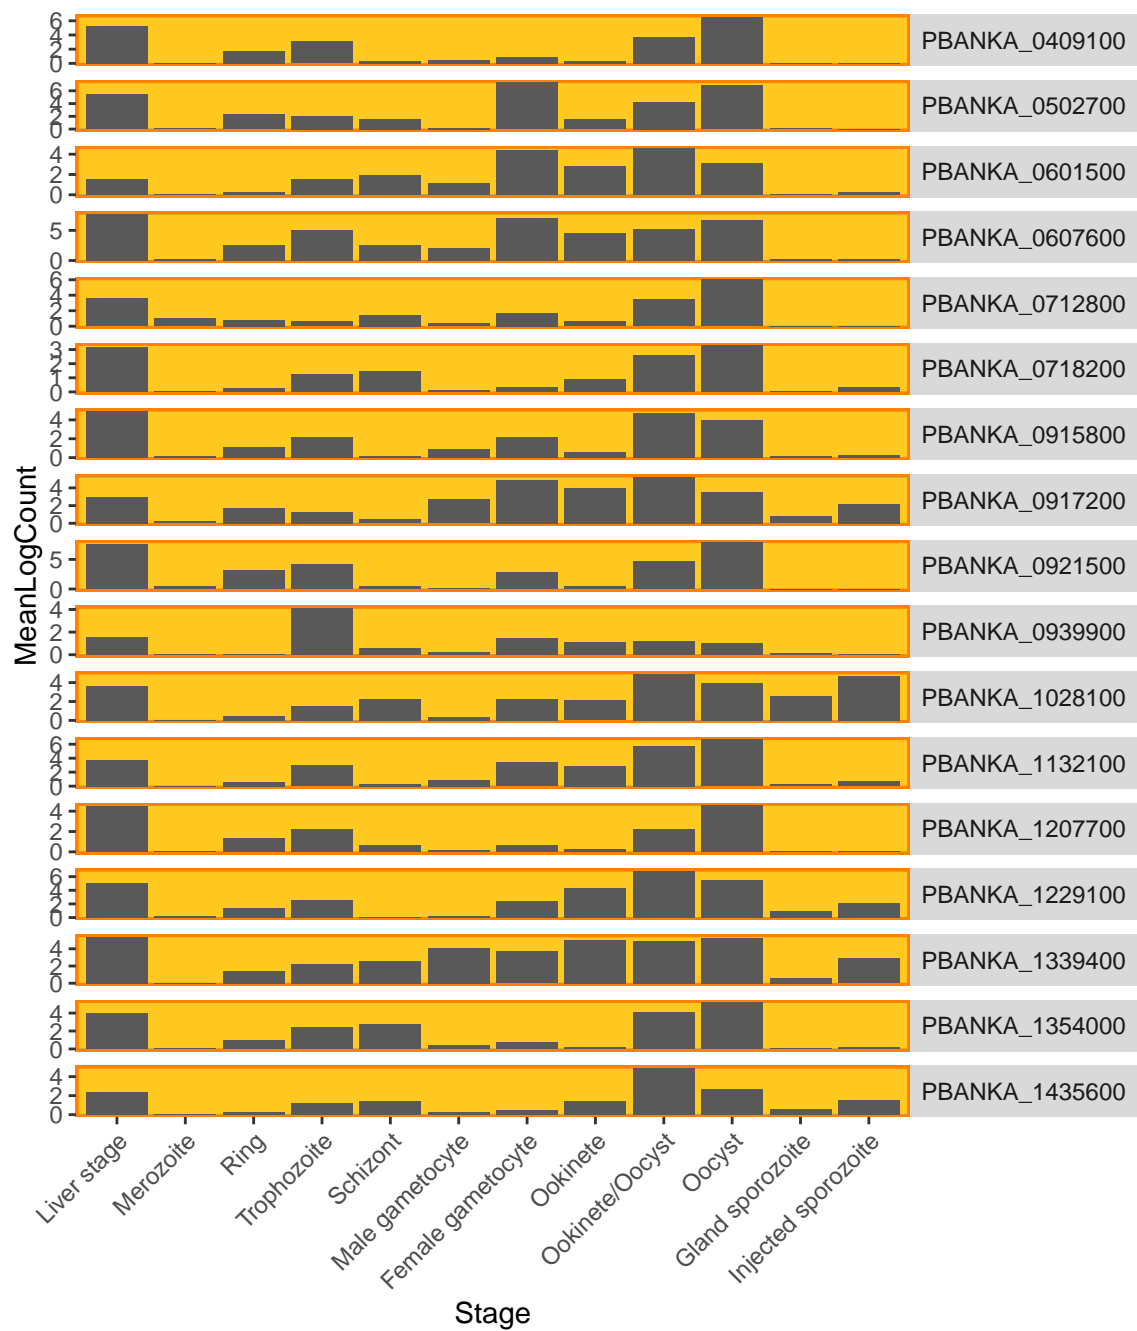

Supplement: s1 [file s1]
